# Supplementary material for: Activated hepatic stellate cell-derived Bmp-1 induces liver fibrosis via mediating hepatocyte epithelial-mesenchymal transition
Source: PubMed Central journal article supplement (PMC10786946; doi:10.1038/s41419-024-06437-8), 2024-01-12

**Figure 1J**

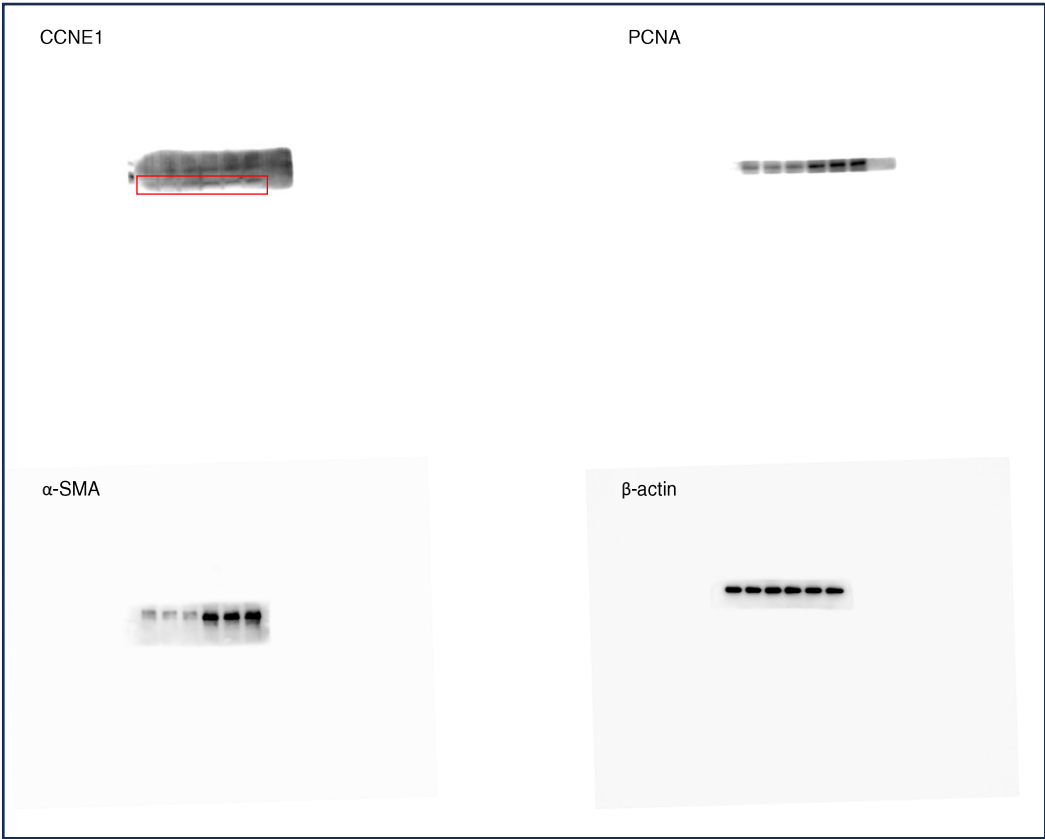

**Figure 1P**

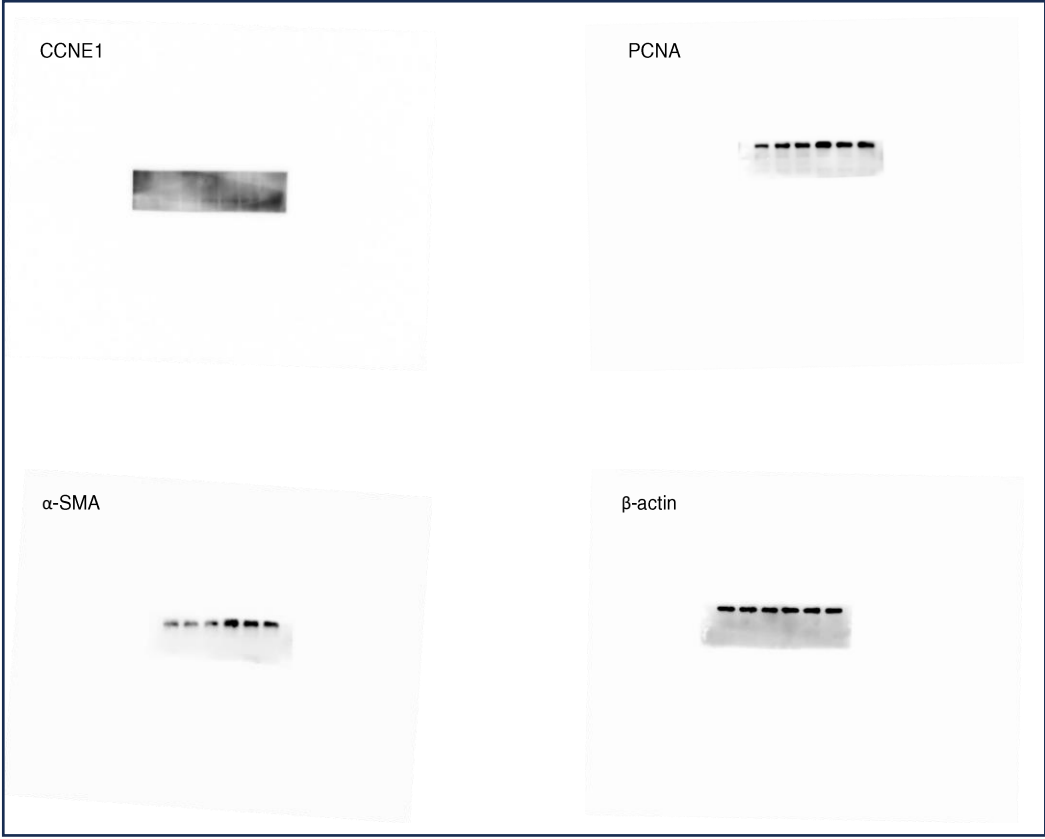

**Figure 2C**

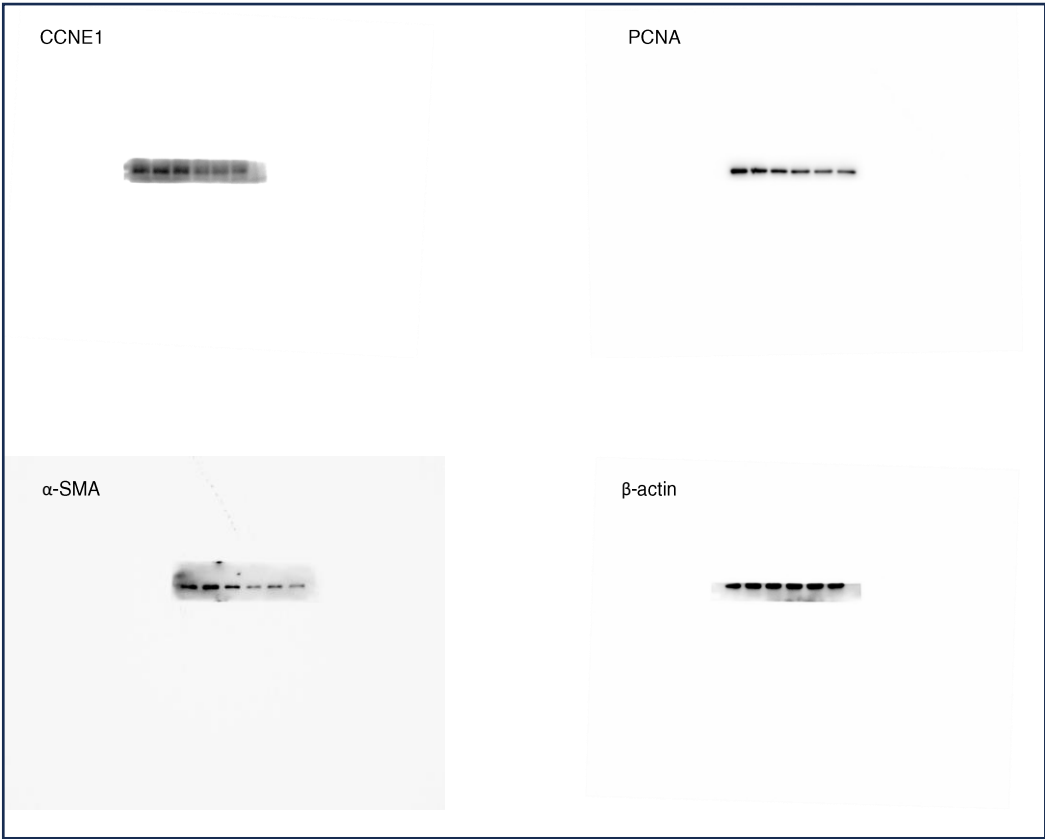

**Figure 2G**

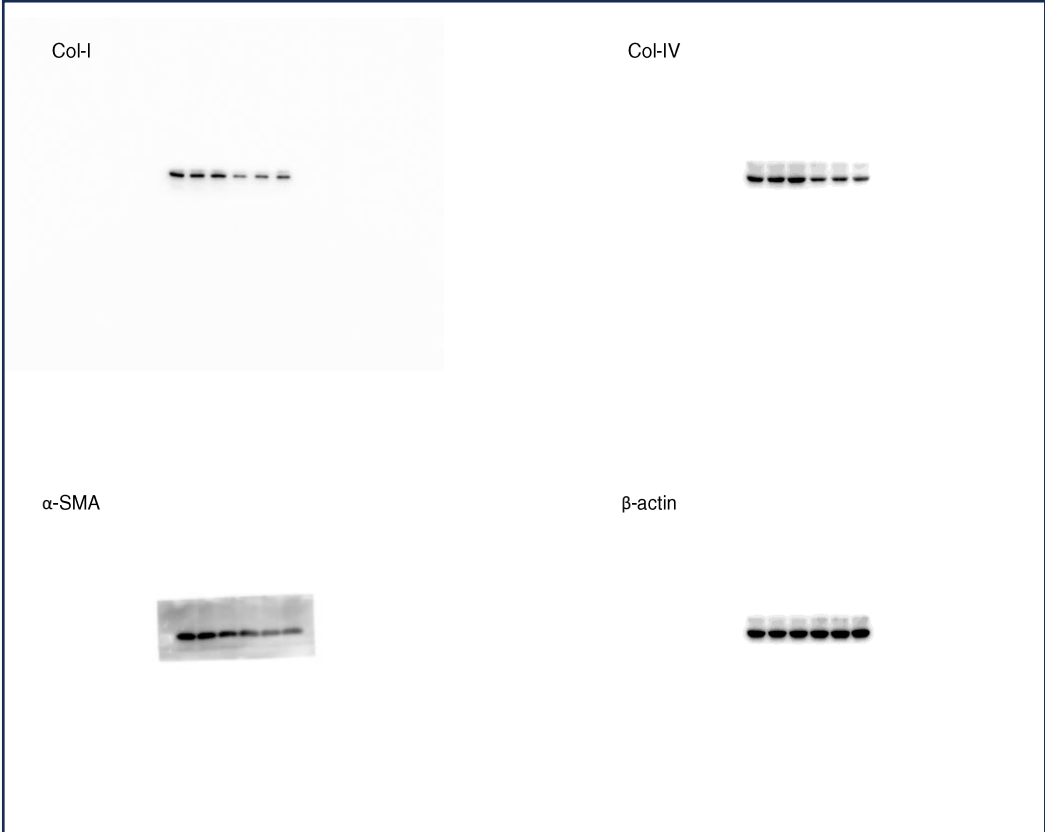

**Figure 3E Left**

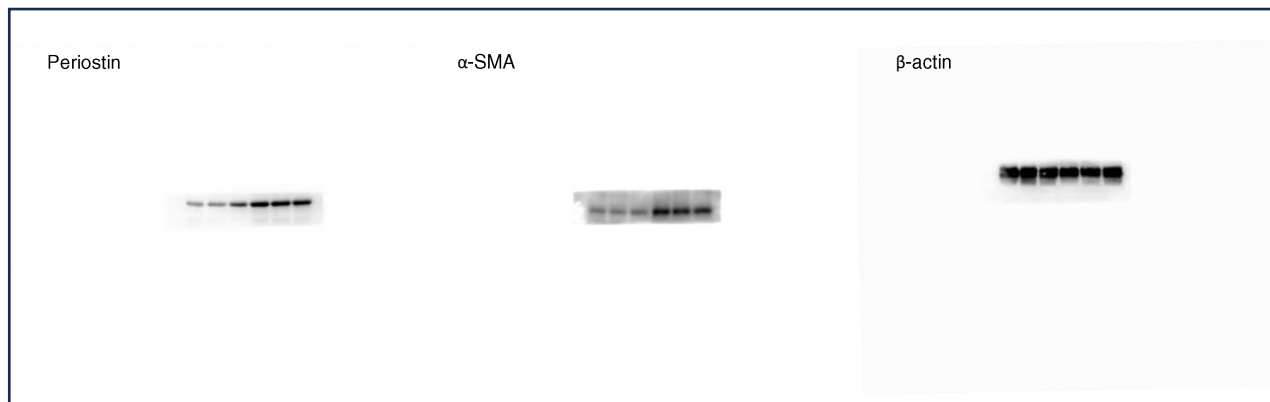

**Figure 3E Right**

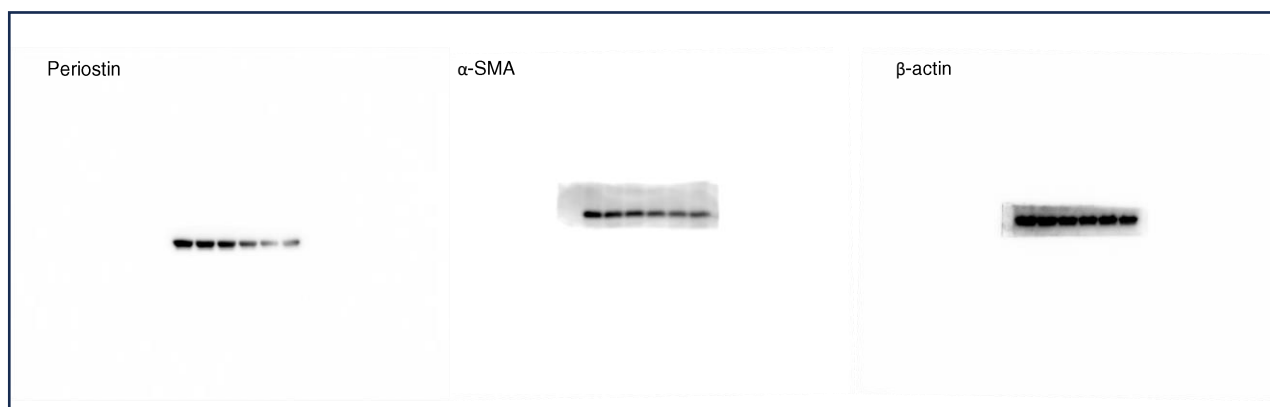

**Figure 3H Left**

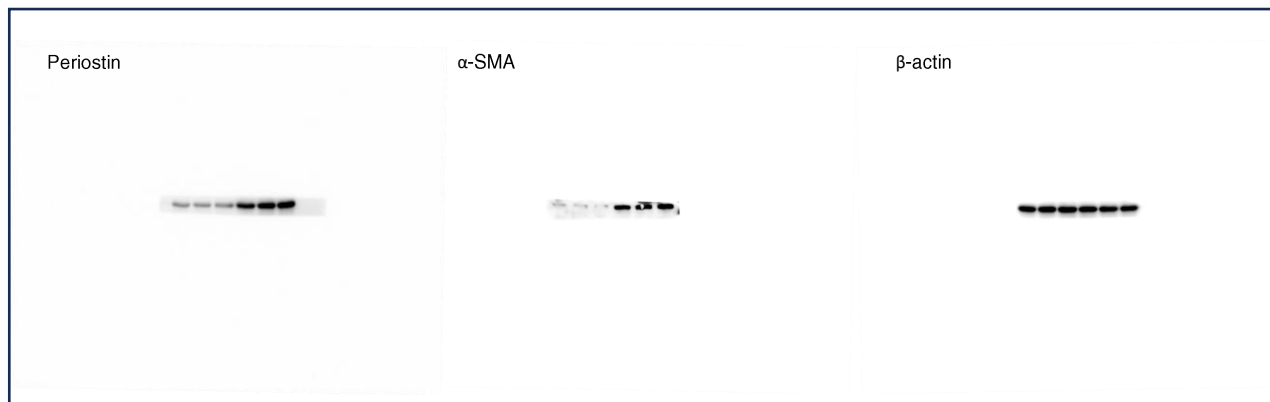

**Figure 3H Mid**

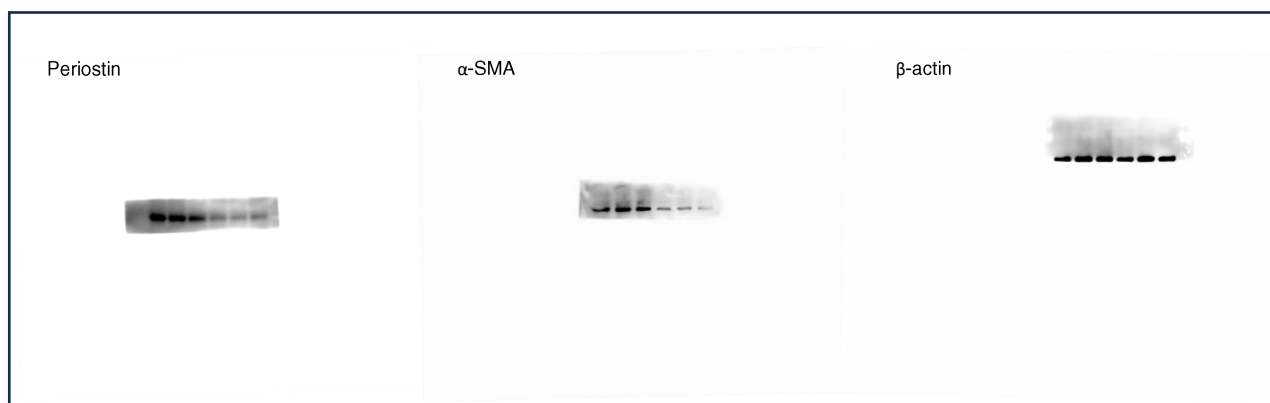

**Figure 3H Right**

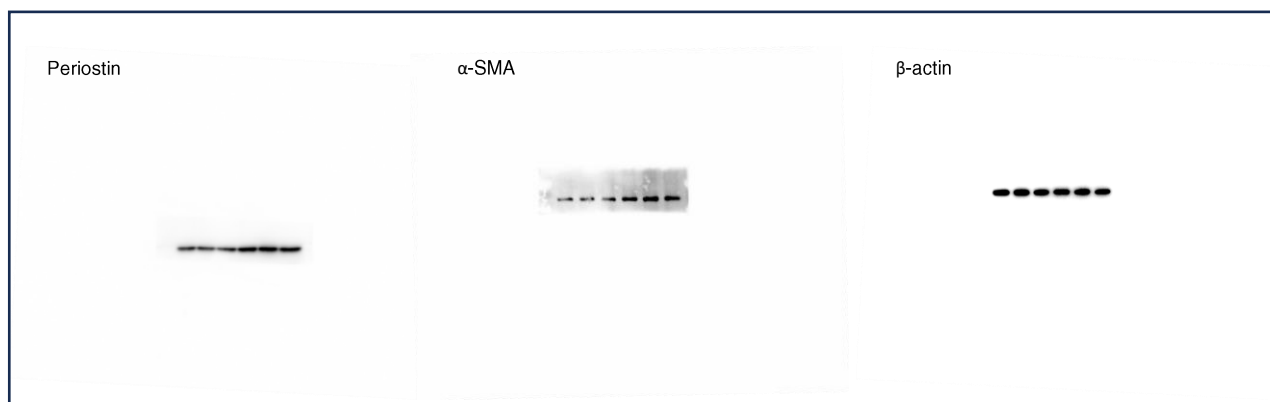

**Figure 3J Left**

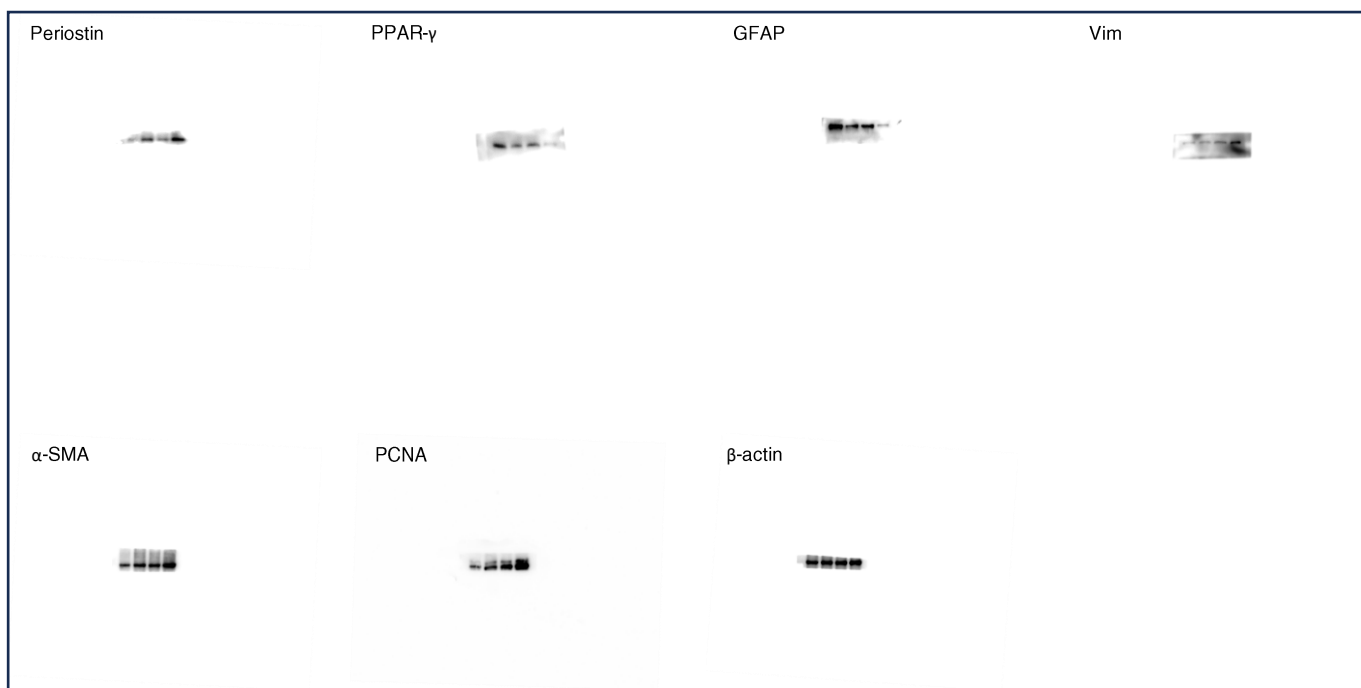

**Figure 3J Right**

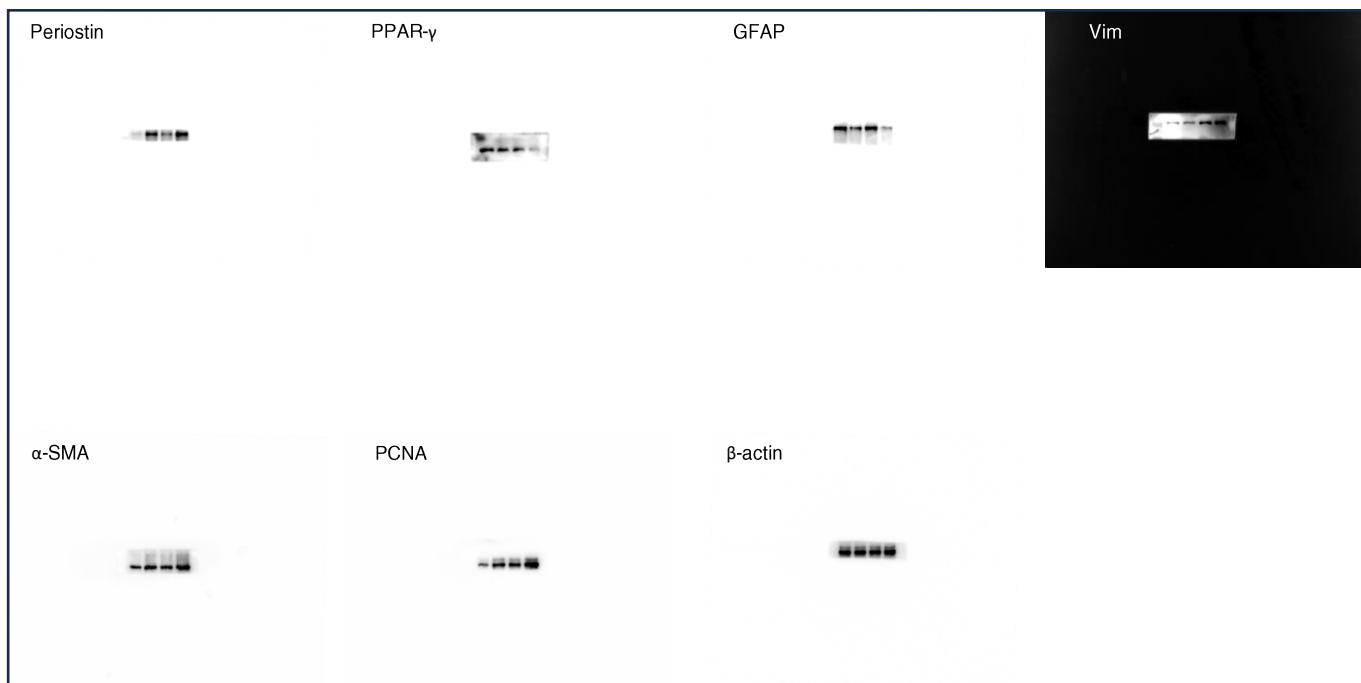

Figure 4E

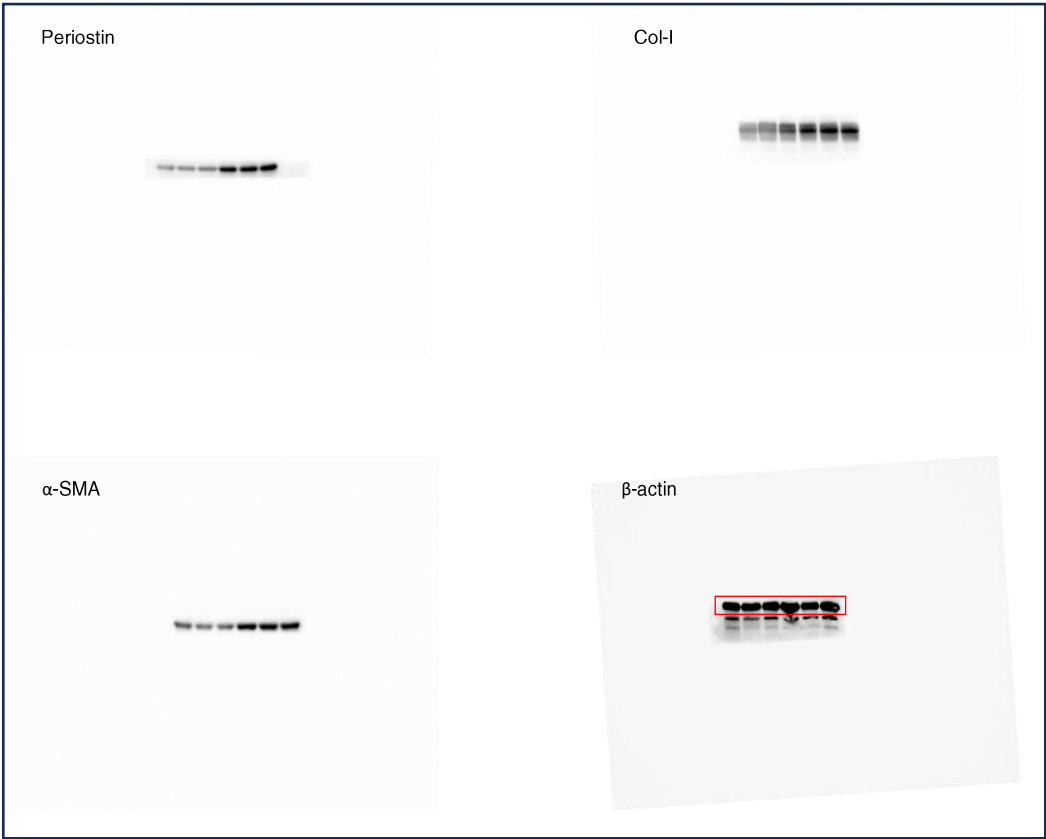

**Figure 5C**

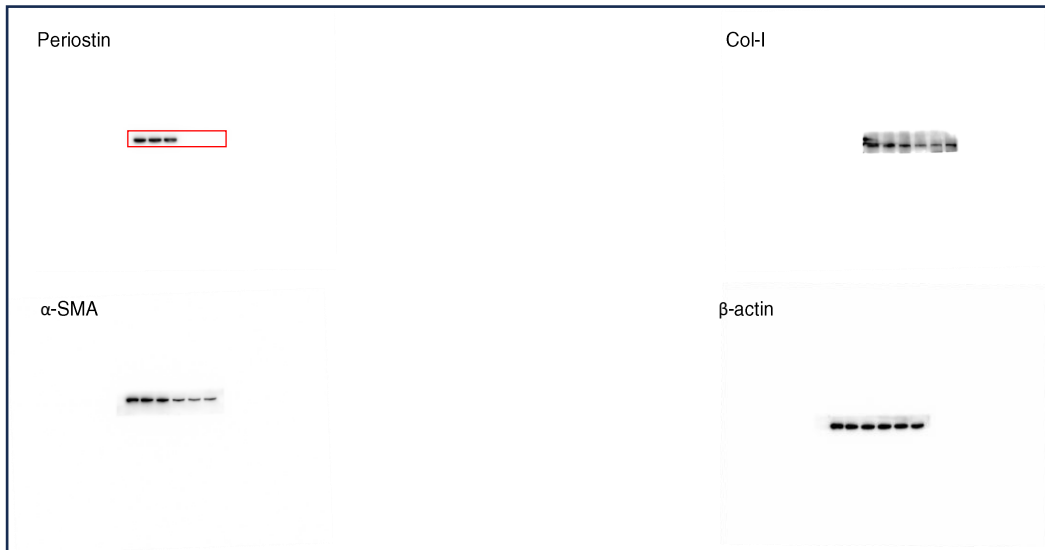

**Figure 5E**

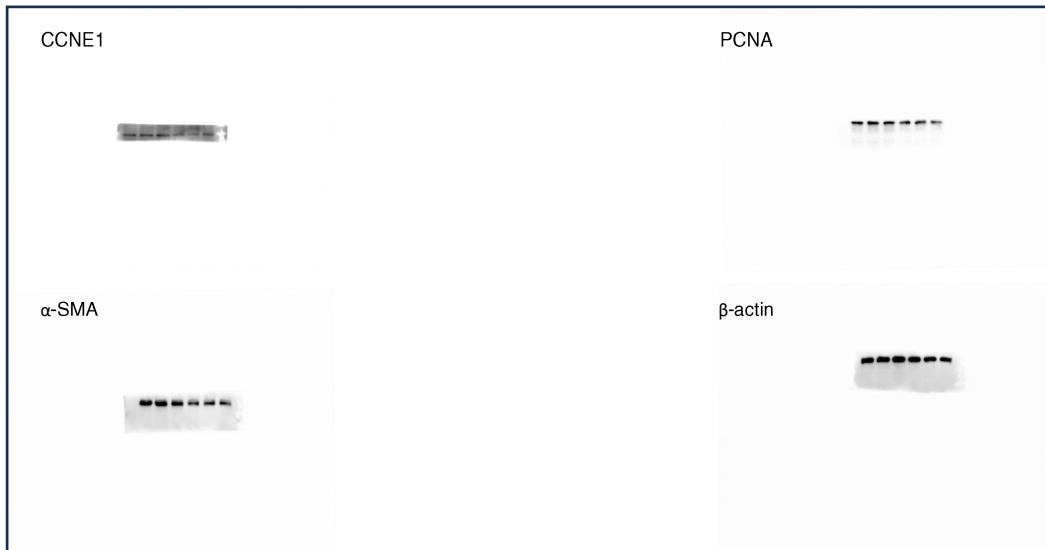

**Figure 5J**

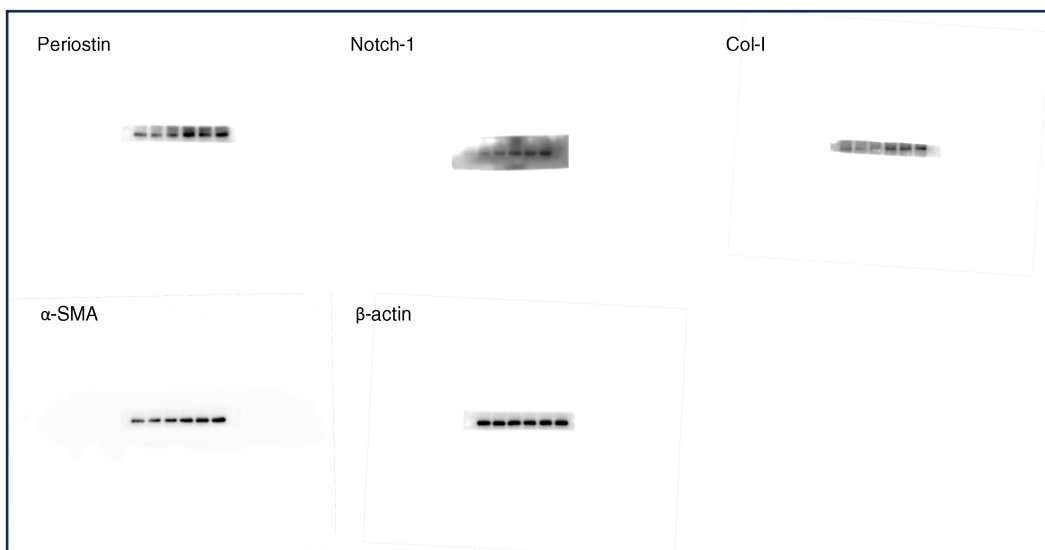

Figure 5K

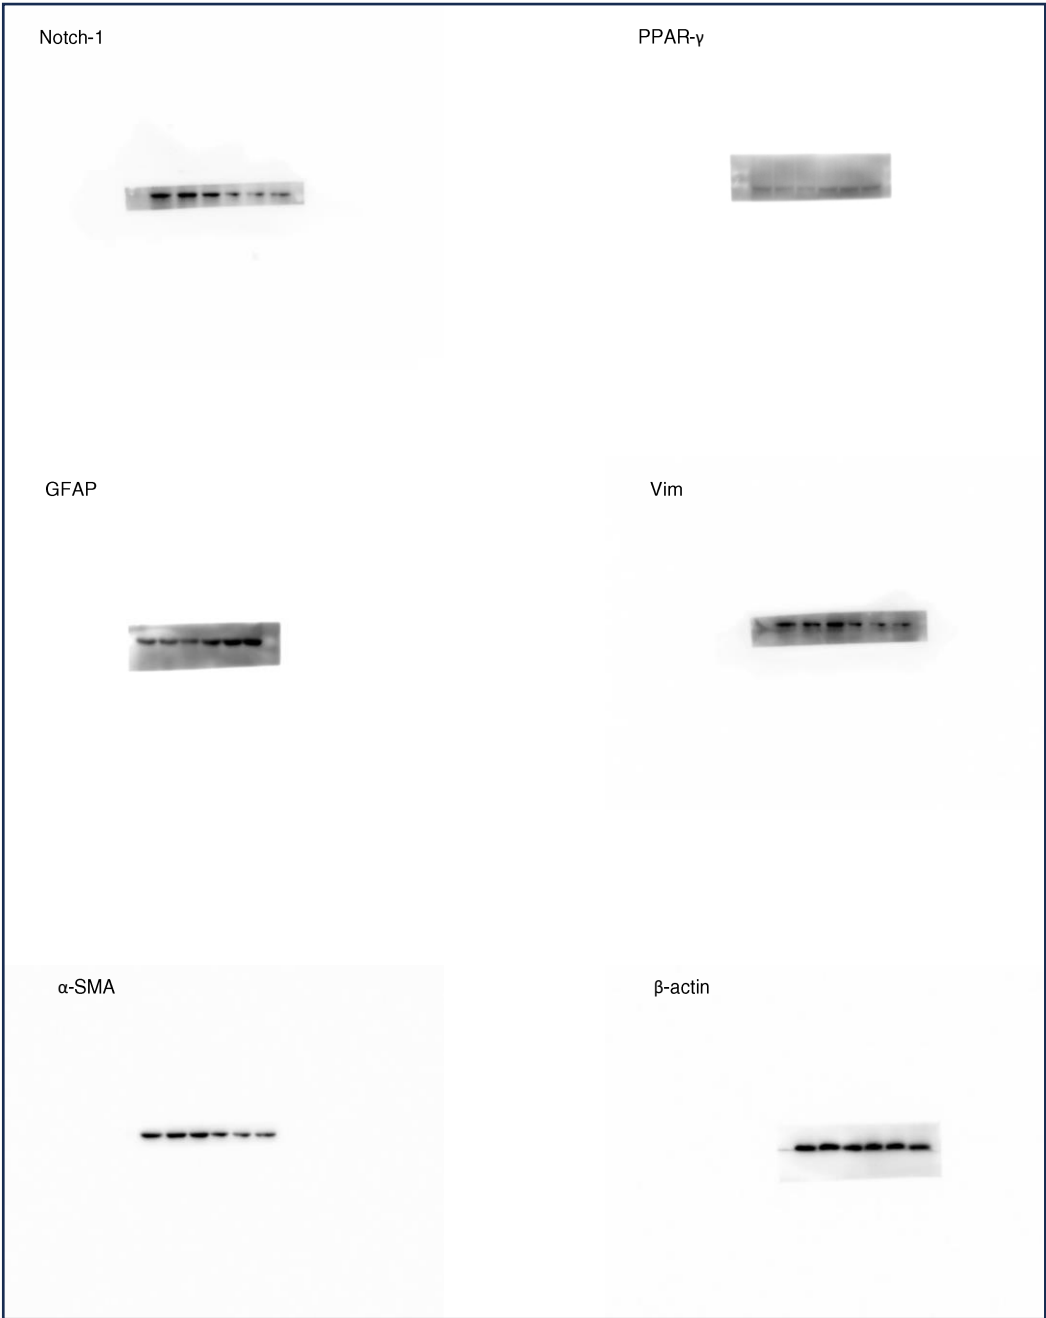



**Figure 6F**

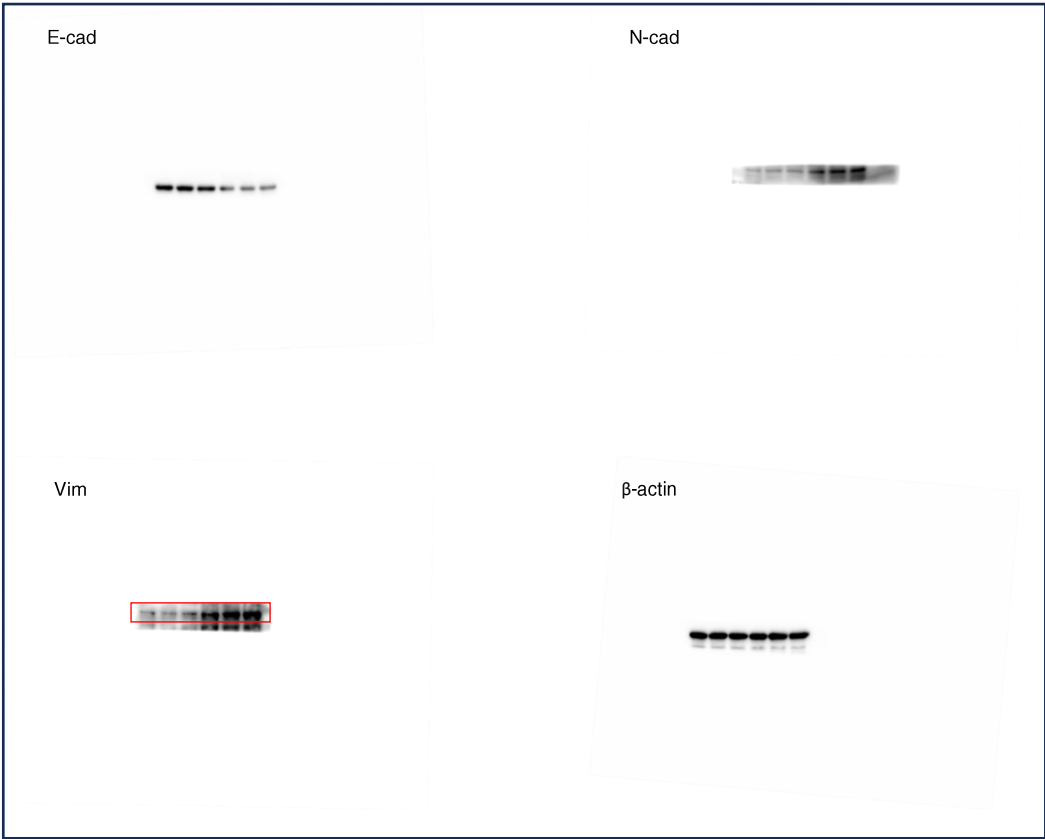

**Figure 6J**

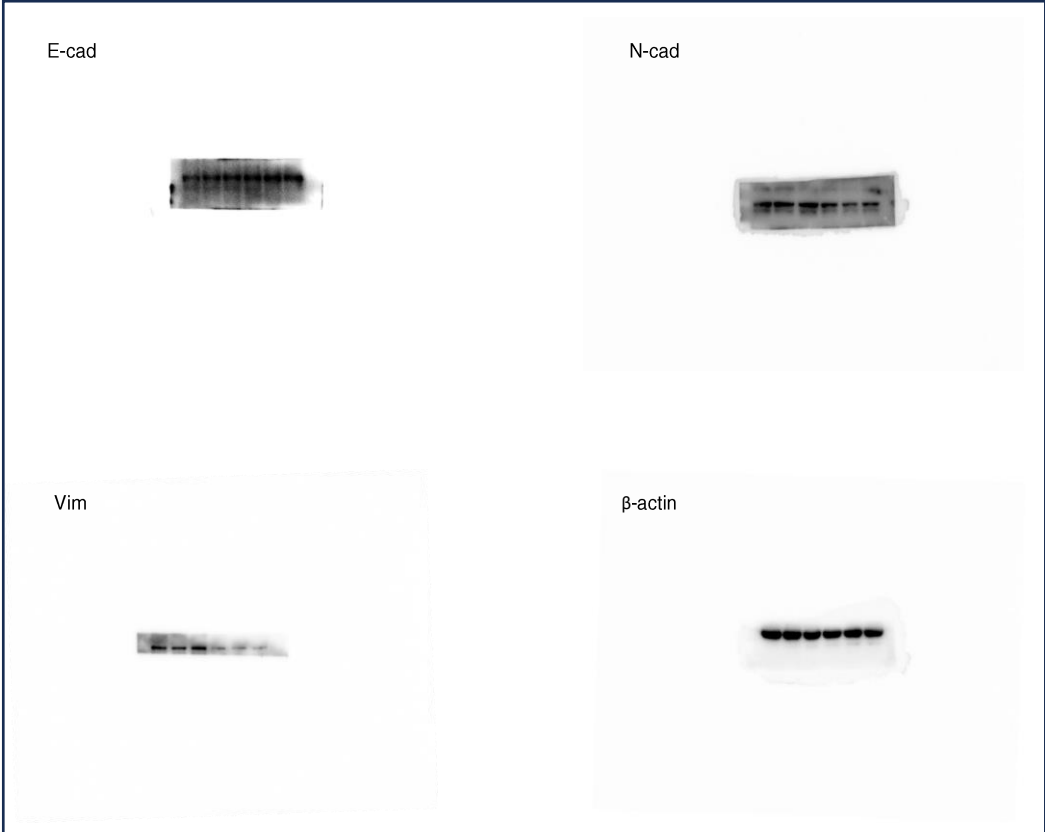

**Figure 7E**

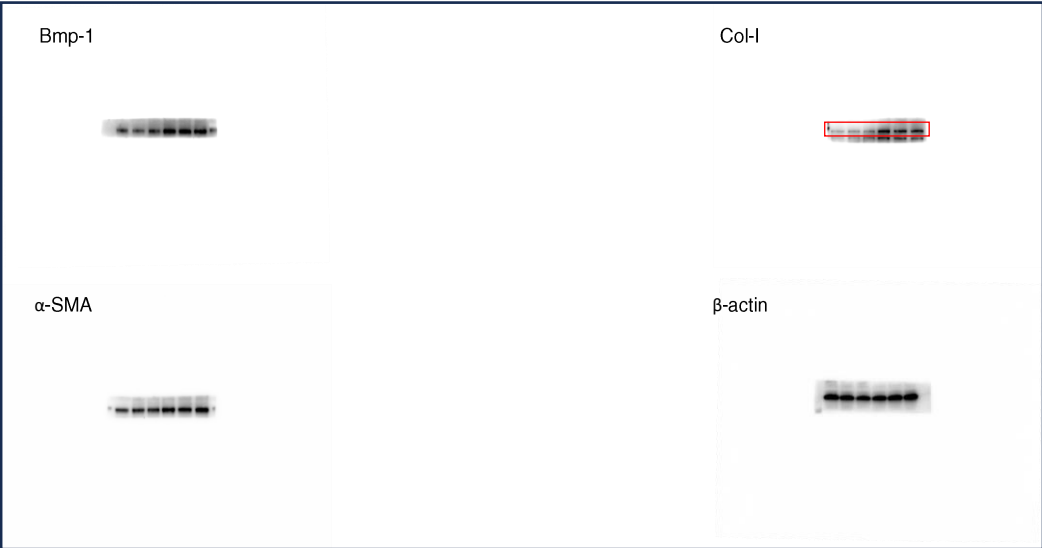

**Figure 7G**

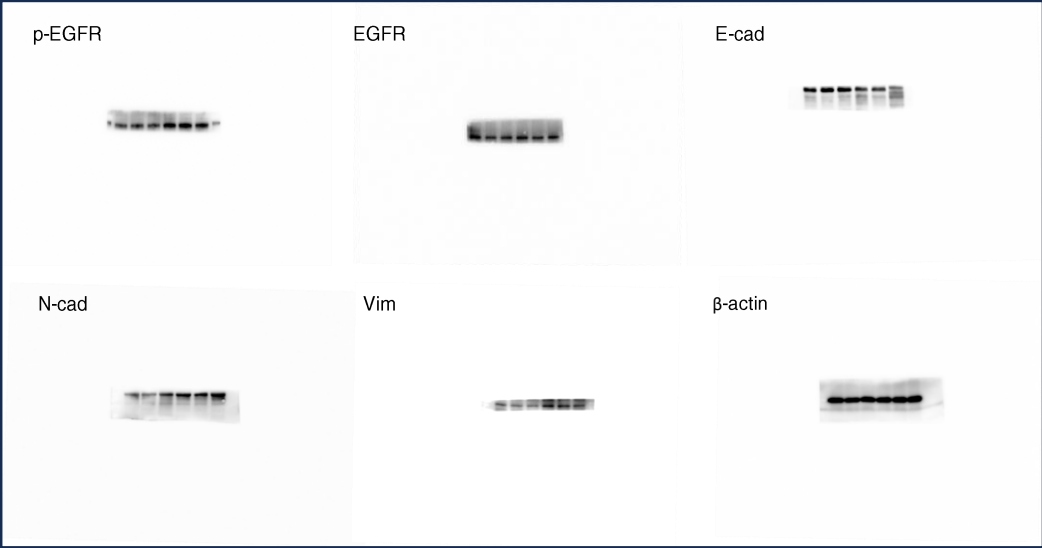

**Figure 7L**

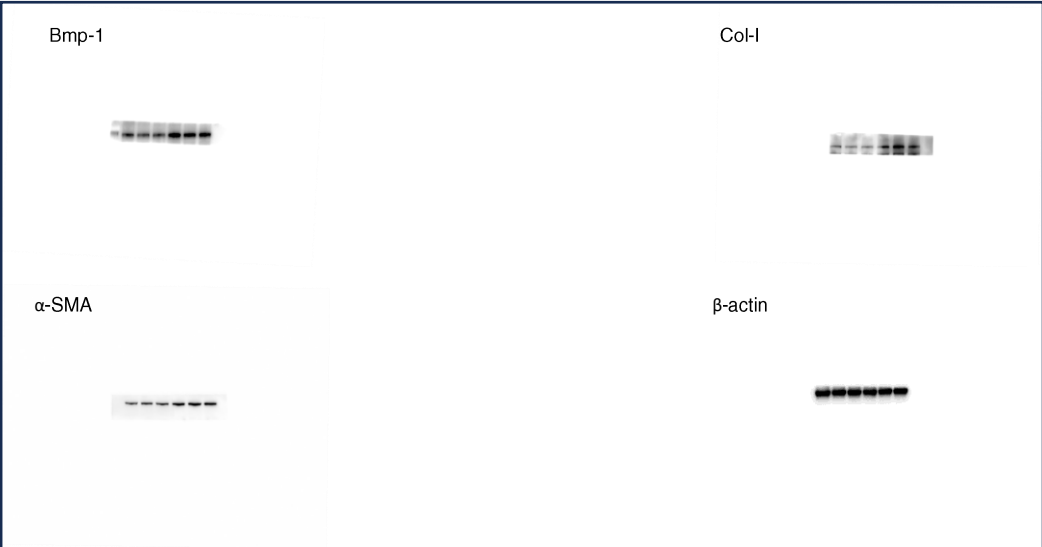

**Figure 8F**

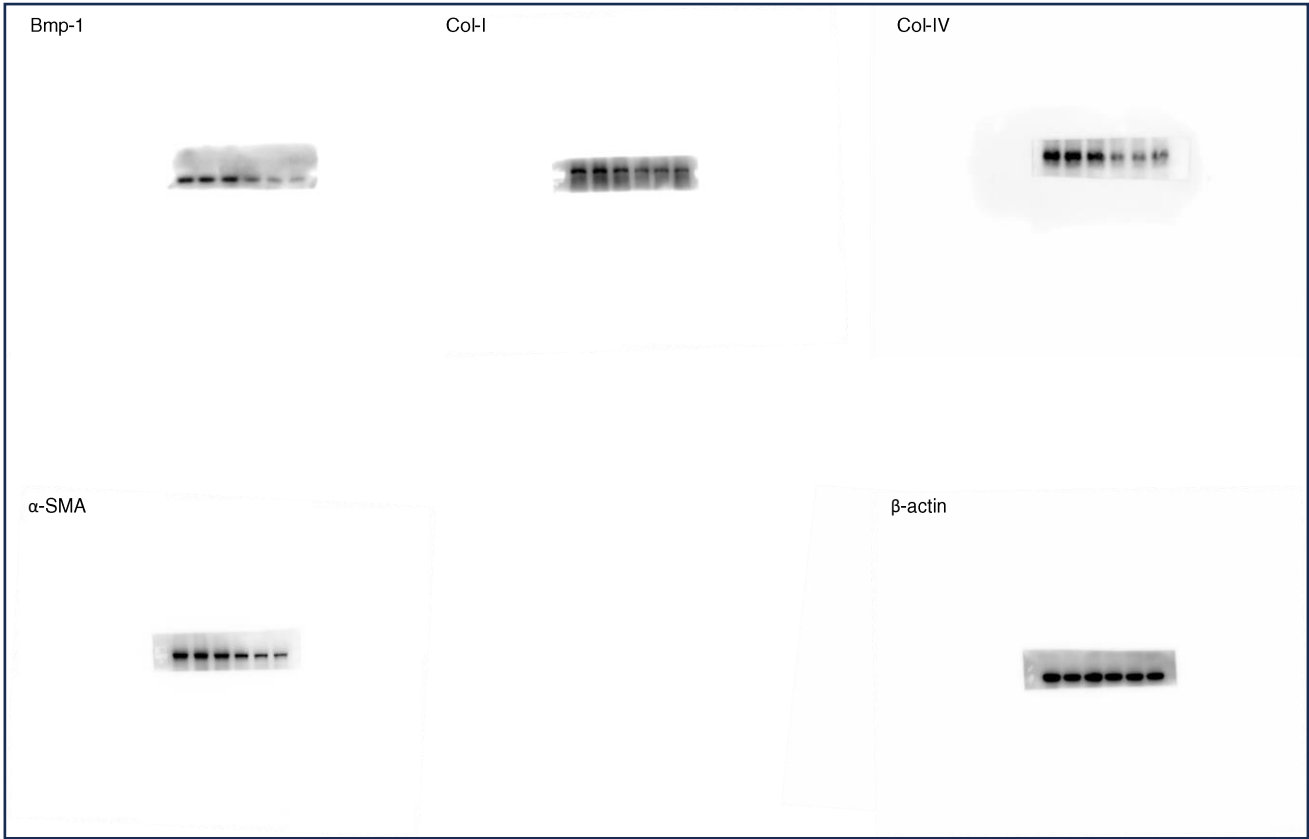

**Figure 8H**

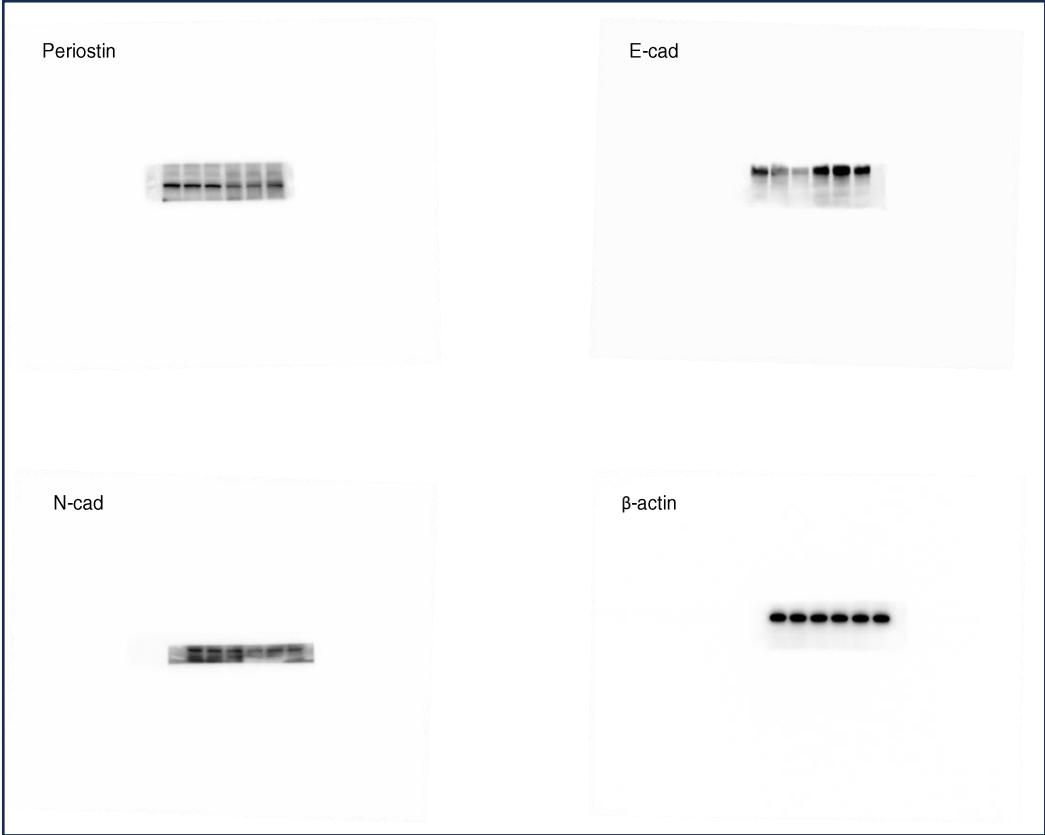

**Figure 8I**

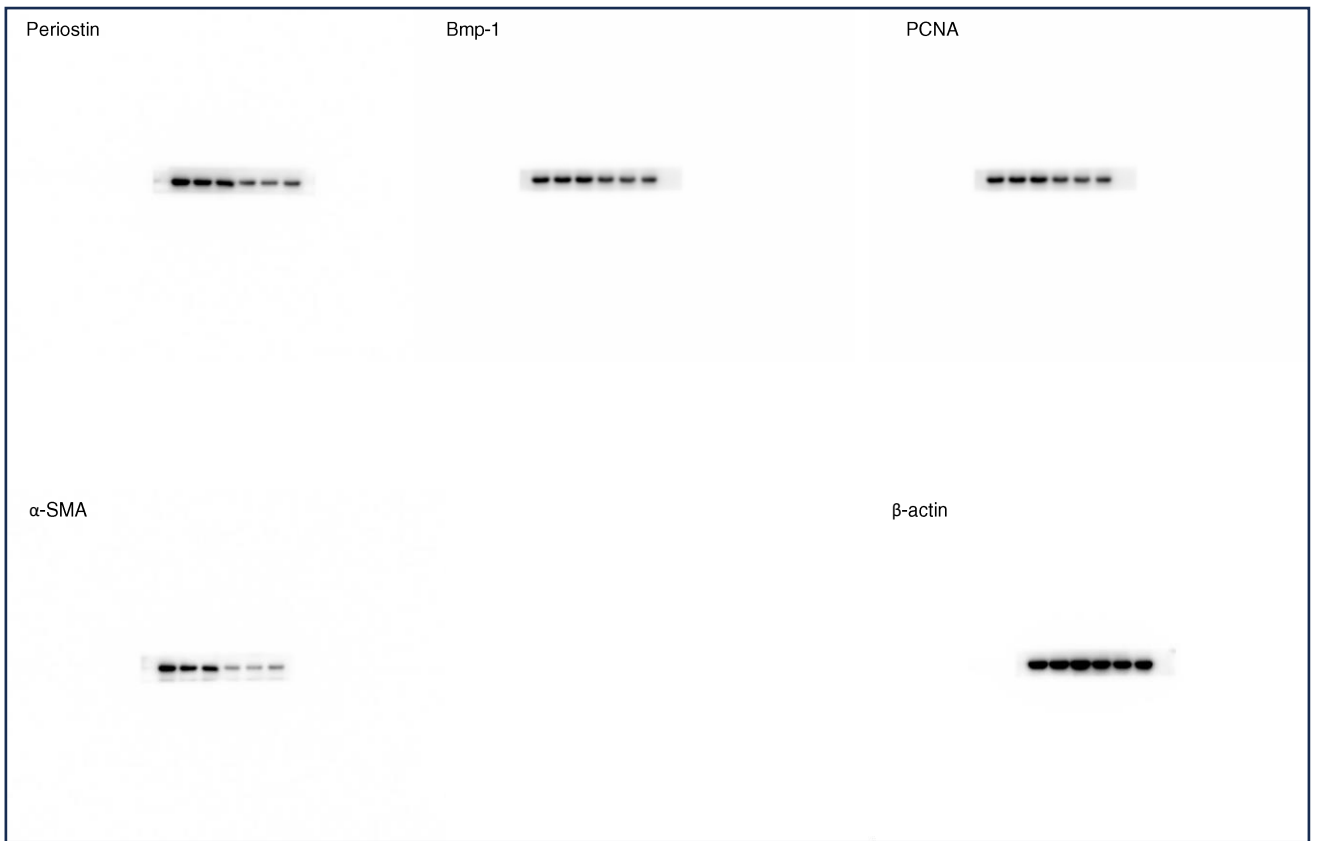

**Figure 8K**

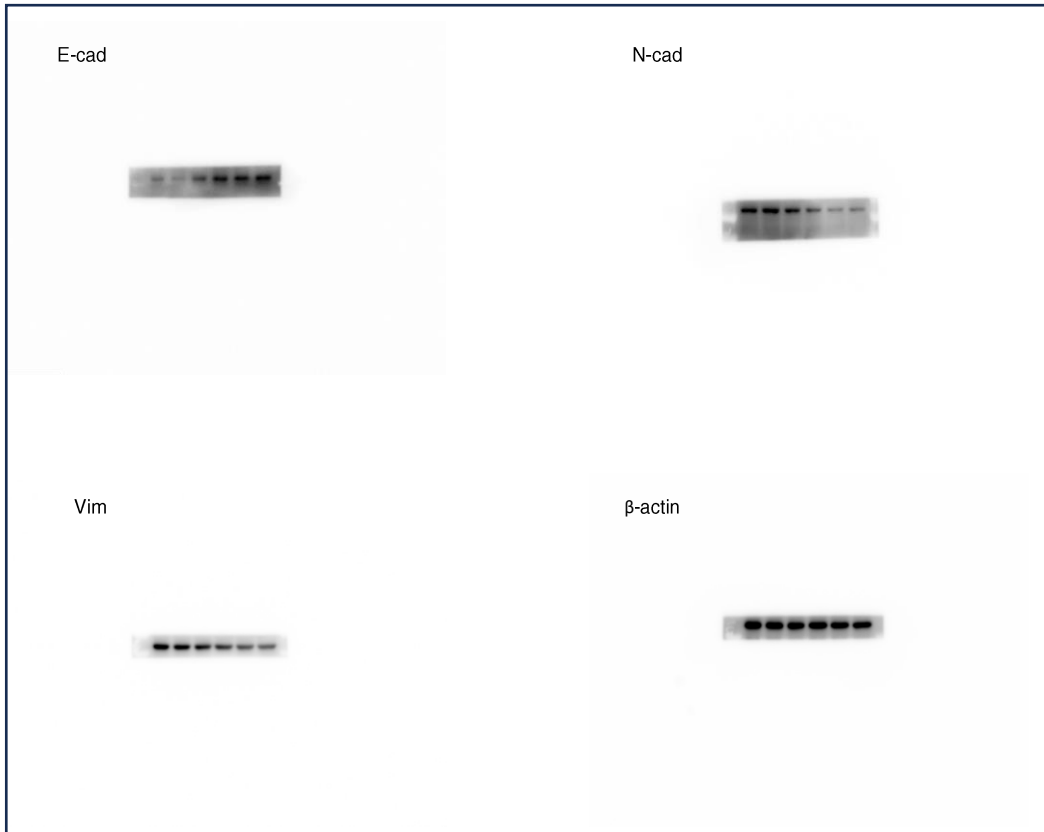

**Figure S2D**

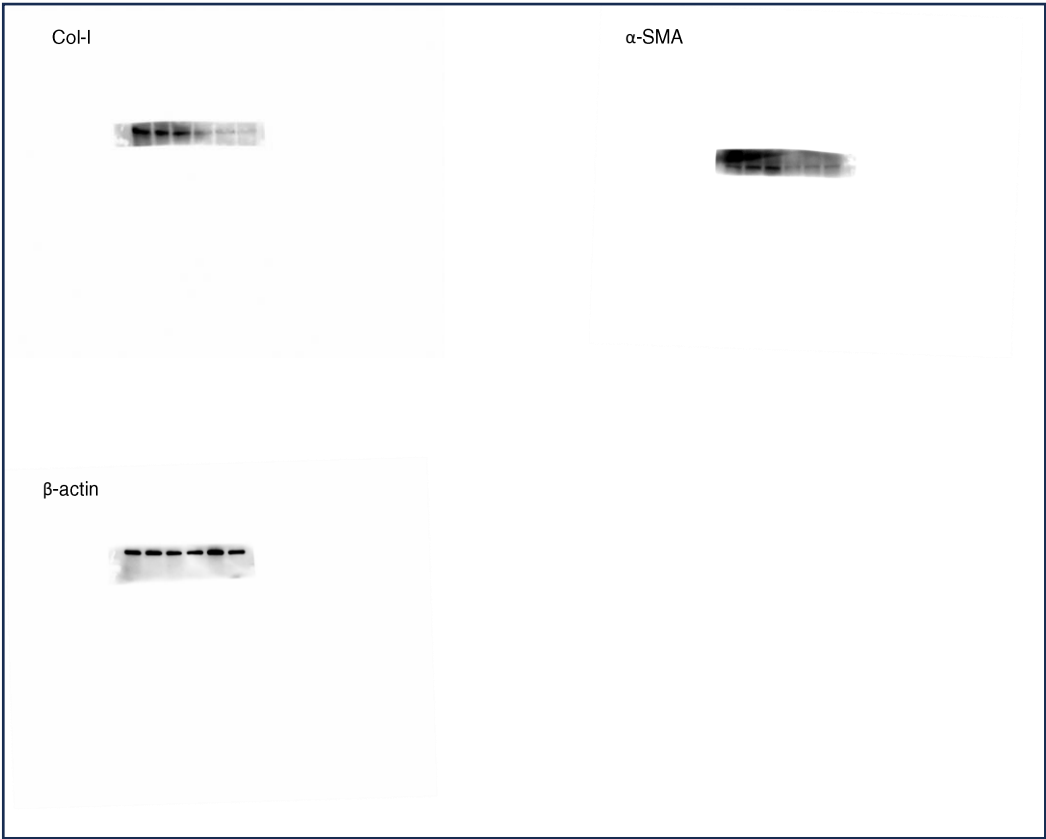

Figure S3E

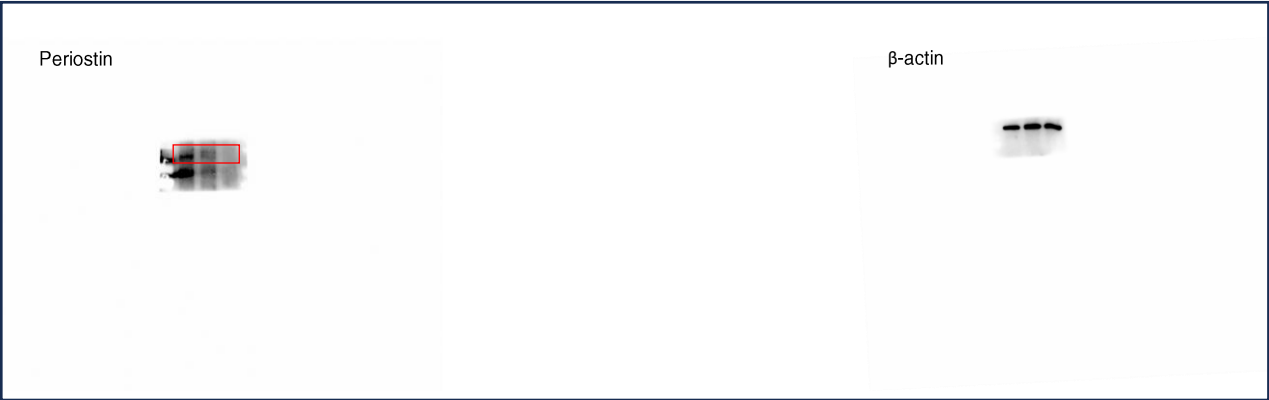

**Figure S8G Left**

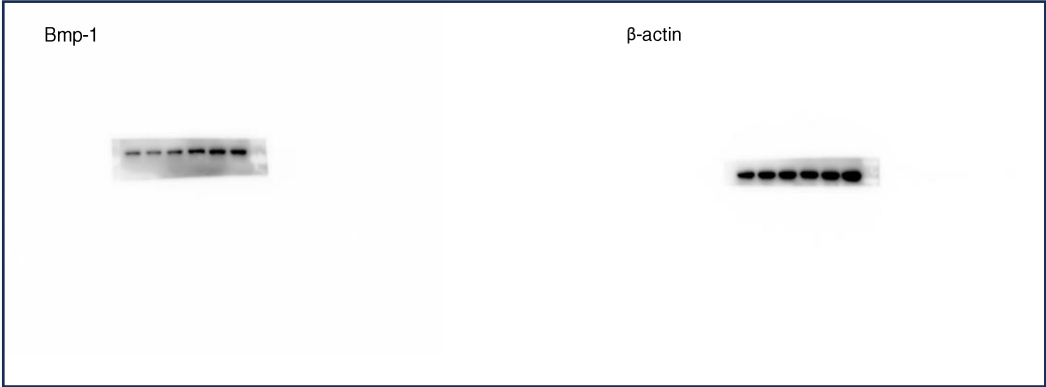

**Figure S8G Right**

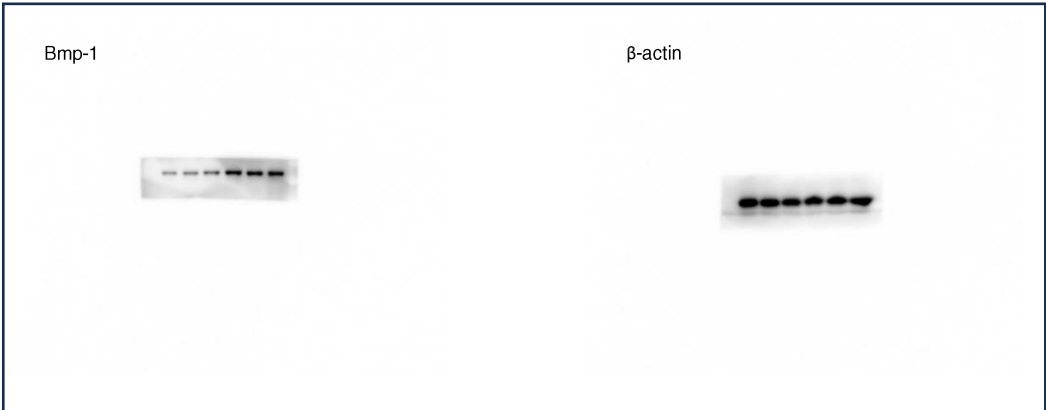

**Figure S8I**

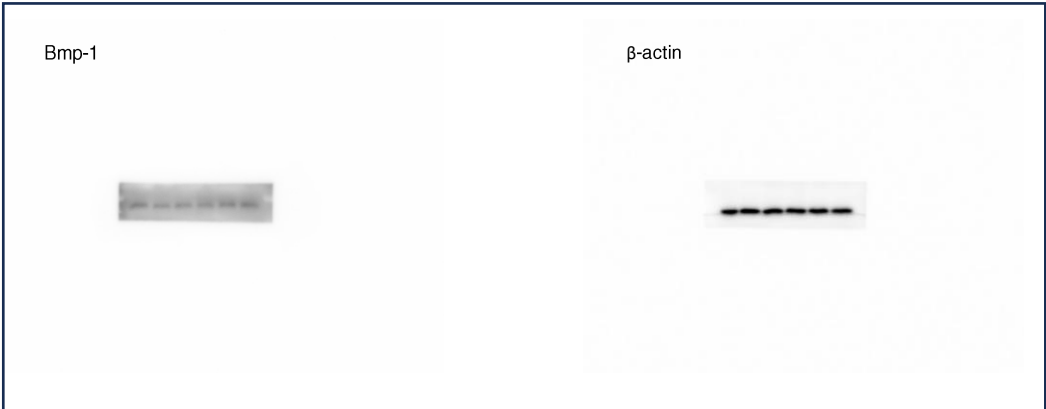

Supplement: 41419_2024_6437_MOESM2_ESM.pdf [file 41419_2024_6437_MOESM2_ESM.pdf]
